# Supplementary material for: Machine learning algorithms to predict major bleeding after isolated coronary artery bypass grafting
Source: PubMed Central journal article supplement (PMC9366116; doi:10.3389/fcvm.2022.881881), 2022-07-28
Supplement: Data_Sheet_1.pdf [file Data_Sheet_1.pdf]

# **Machine learning algorithms to predict major bleeding after isolated coronary artery bypass grafting**

## **Supplementary Material**

### **Methods**

#### **5-fold cross validation**

The performance of machine learning models was evaluated using a stratified 5-fold cross-validation procedure during hyperparameter tuning. In this procedure, the dataset is randomly divided into 5 equal folds, each with approximately the same number of events. Five validation experiments are then performed, with each fold used in rotation as the validation set, and the remaining 4 folds as the training set. Therefore, each data point is used once for testing and 4 times for training, resulting in 5 experimental machine learning models trained on 80% fractions. The average of the validation results from 5 experimental models is calculated to provide a measure of the overall performance.

#### **Variable importance**

For classification models, each predictor will have a separate variable importance for each class. All measures of importance are scaled to have a maximum value of 100.

### Random forest / Conditional inference random forest

To examine the importance of each predictor in the random forest models, we used permutation-based variable importance that is determined by the normalized average value of difference between prediction accuracy of the out-of-bag estimation and that of the same measure after permutating each predictor.

### Xgboost / Stochastic gradient boosting

This method randomly permutes each predictor variable at a time and computes the associated reduction in predictive performance. This is similar to the variable importance measures used for random forests, but this method currently computes using the entire training dataset, and sums the importance over each boosting iteration.

### **Conditional inference random forest (CIRF)**

CIRF is an ensemble of individual decision trees that uses statistical theory based on covariate selection scheme during the training process. CIRF can avoid potential bias and enables the more appropriate calculation of feature importance.

### **R packages**

The following R packages for machine learning approaches were used: *glmnet*, *rms*, *ranger*, *rpart*, *caret*, *xgboost*, *gbm*, *kernlab*, *plyr*, *randomForest*, *party*, *ada*, *naivebayes*, and *e1071*.

Table S1. Bleeding severity stratified by universal definition of perioperative bleeding in adult cardiac surgery

| Bleed severity | Sternal closure delay | Blood loss within 12 h (mL) | RBC (U) | FFP (U) | Platelets (U) | Cryoprecipitate | PPC | rFVIIa | Re-exploration or tamponade |
|----------------|-----------------------|-----------------------------|---------|---------|---------------|-----------------|-----|--------|-----------------------------|
| Class 0        | No                    | <600                        | 0       | 0       | 0             | No              | No  | No     | No                          |
| Class 1        | No                    | 601-800                     | 1       | 0       | 0             | No              | No  | No     | No                          |
| Class 2        | No                    | 801-1000                    | 2-4     | 2-4     | Yes           | Yes             | Yes | No     | No                          |
| Class 3        | Yes                   | 1001-2000                   | 5-10    | 5-10    | NA            | NA              | NA  | No     | Yes                         |
| Class 4        | NA                    | >2000                       | >10     | >10     | NA            | NA              | NA  | Yes    | NA                          |

RBC, Red blood cells; FFP, fresh frozen plasma, PCC, prothrombin complex concentrate; rFVIIa, recombinated activated factor VII; NA, not applicable.

Table S2. Missing values and dispositions.

| Variables          | No. of missing values |
|--------------------|-----------------------|
| NT-proBNP, (pg/ml) | 66 (6.3%)             |
| Calcium, (mmol/L)  | 8 (0.7%)              |
| PT                 | 9 (0.8%)              |
| INR                | 11 (1.0%)             |
| WBC                | 3 (0.2%)              |
| HSCRP, (mg/L)      | 10 (0.9%)             |

NT-proBNP, N-terminal prohormone of brain natriuretic peptide; HSCRP, high sensitivity C reactive protein; PT, prothrombin time; INR, international normalized ratio; WBC, white blood cell

Table S3 Baseline characteristics between the training and test set

| Parameter                                | Total<br>(n=1045)     | Training<br>(n=732)   | Test<br>(n=313)       | <i>P</i> |
|------------------------------------------|-----------------------|-----------------------|-----------------------|----------|
| Age (years)                              | 62(55-66)             | 62(55-67)             | 61(55-66)             | 0.801    |
| Male, n (%)                              | 819 (78.37)           | 559 (76.37)           | 260 (83.07)           | 0.017    |
| Height (m)                               | 1.69 (1.63-1.72)      | 1.68(1.62-1.72)       | 1.70(1.64-1.72)       | 0.37     |
| Weight (kg)                              | 72.00(65.00-80.00)    | 72.00(65.00-80.00)    | 73.00(65.00-80.00)    | 0.749    |
| BSA (m <sup>2</sup> )                    | 1.84±0.17             | 1.83±0.17             | 1.84±0.16             | 0.577    |
| Smoking history, n (%)                   | 555 (53.11)           | 375 (51.23)           | 180 (57.51)           | 0.068    |
| Angina, n (%)                            | 988 (94.55)           | 699 (95.49)           | 289 (92.33)           | 0.052    |
| Myocardial infarction, n (%)             | 86 (8.23)             | 62 (8.47)             | 24 (7.67)             | 0.714    |
| Arrhythmia, n (%)                        | 28 (2.68)             | 22 (3.01)             | 6 (1.92)              | 0.405    |
| Previous surgery, n (%)                  | 247 (23.64)           | 176 (24.04)           | 71 (22.68)            | 0.691    |
| Diabetes, n (%)                          | 381 (36.46)           | 272 (37.16)           | 109 (34.82)           | 0.484    |
| Hyperlipidemia, n (%)                    | 854 (81.72)           | 603 (82.38)           | 251 (80.19)           | 0.432    |
| Hypertension, n (%)                      | 650 (62.20)           | 459 (62.70)           | 191 (61.02)           | 0.626    |
| Kidney failure, n (%)                    | 35 (3.35)             | 21 (2.87)             | 14 (4.47)             | 0.192    |
| Dialysis, n (%)                          | 27 (2.58)             | 17 (2.32)             | 10 (3.19)             | 0.402    |
| Chronic pulmonary disease, n (%)         | 17 (1.63)             | 11 (1.50)             | 6 (1.92)              | 0.602    |
| Congestive heart failure, n (%)          | 1032 (98.76)          | 722 (98.63)           | 310 (99.04)           | 0.765    |
| Anemia, n (%)                            | 267 (25.55)           | 183 (25.00)           | 84 (26.84)            | 0.536    |
| Peripheral vascular disease, n (%)       | 251 (24.02)           | 174 (23.77)           | 77 (24.60)            | 0.813    |
| Venous disease, n (%)                    | 62 (5.93)             | 46 (6.28)             | 16 (5.11)             | 0.568    |
| Cerebrovascular disease, n (%)           | 113 (10.81)           | 84 (11.48)            | 29 (9.27)             | 0.328    |
| Previous PTCA, n (%)                     | 25 (2.39)             | 16 (2.19)             | 9 (2.88)              | 0.511    |
| Previous thrombolysis, n (%)             | 6 (0.57)              | 5 (0.68)              | 1 (0.32)              | 0.675    |
| CHD family history, n (%)                | 132 (12.63)           | 77 (10.52)            | 55 (17.57)            | 0.002    |
| Preoperative statin use, n (%)           | 610 (58.37)           | 425 (58.06)           | 185 (59.11)           | 0.784    |
| Preoperative anticoagulant use, n (%)    | 917 (87.75)           | 639 (87.30)           | 278 (88.82)           | 0.537    |
| Antiplatelet drugs pause <5 days, n (%)  | 15 (1.44)             | 12 (1.64)             | 3 (0.96)              | 0.572    |
| Left main coronary artery disease, n (%) | 198 (18.95)           | 134 (18.31)           | 64 (20.45)            | 0.438    |
| RBC, (x10 <sup>12</sup> /L)              | 4.45±0.52             | 4.44±0.52             | 4.45±0.54             | 0.778    |
| WBC, (x10 <sup>9</sup> /L)               | 6.43(5.34-7.53)       | 6.36(5.31-7.41)       | 6.62(5.45-7.91)       | 0.029    |
| PLT, (x10 <sup>9</sup> /L)               | 209(177-247)          | 208 (176-247)         | 212.00(181-246)       | 0.276    |
| Platelet distribution width, (fL)        | 12.30(11.10-13.80)    | 12.30(11.20-13.80)    | 12.40(11.10-13.70)    | 0.993    |
| Platelet volume, (fL)                    | 10.60(10.00-11.20)    | 10.50(10.00-11.20)    | 10.60(9.90-11.20)     | 0.861    |
| Platelet-large cell ration, (%)          | 29.50(24.60-34.70)    | 29.40(24.70-34.90)    | 29.80(24.20-34.20)    | 0.979    |
| Thrombocytocrit, (%)                     | 0.22(0.19-0.26)       | 0.22(0.19-0.26)       | 0.23(0.19-0.26)       | 0.286    |
| Hemoglobin, (g/L)                        | 137(126-146)          | 137 (126-146)         | 137 (126-147)         | 0.757    |
| Total protein, (g/L)                     | 66.10(62.90-70.20)    | 66.05(62.90-70.10)    | 66.30(62.80-70.50)    | 0.884    |
| Albumin, (g/L)                           | 40.90(38.70-43.50)    | 40.80(38.70-43.42)    | 41.10(38.70-43.60)    | 0.961    |
| Potassium, (mmol/L)                      | 4.03(3.79-4.25)       | 4.03(3.77-4.25)       | 4.03(3.82-4.26)       | 0.283    |
| Sodium, (mmol/L)                         | 141.07(139.06-142.85) | 141.10(139.12-143.01) | 141.00(139.00-142.50) | 0.157    |
| Calcium, (mmol/L)                        | 2.26(2.19-2.34)       | 2.26(2.19-2.34)       | 2.26(2.18-2.33)       | 0.67     |
| Glucose, (mmol/L)                        | 5.34(4.70-6.56)       | 5.34(4.69-6.54)       | 5.30(4.72-6.63)       | 0.941    |
| BUN, (mmol/L)                            | 5.24(4.22-6.43)       | 5.23(4.19-6.44)       | 5.24(4.35-6.38)       | 0.949    |
| Creatine, (μmol/L)                       | 82.80(71.16-94.00)    | 82.00(70.48-94.00)    | 83.87(73.17-94.00)    | 0.288    |
| GFR, (ml/min/1.73m <sup>2</sup> )        | 84.28(71.53-93.92)    | 84.29(71.51-93.94)    | 84.23(72.18-93.44)    | 0.852    |
| HSCRP, (mg/L)                            | 1.34(0.65-2.97)       | 1.38(0.66-3.10)       | 1.25(0.64-2.68)       | 0.262    |

|                                              |                            |                            |                            |       |
|----------------------------------------------|----------------------------|----------------------------|----------------------------|-------|
| NT-proBNP, (pg/ml)                           | 155.60(63.50-367.10)       | 156.35(62.98-369.52)       | 153.00(64.70-355.70)       | 0.934 |
| PT, (s)                                      | 13.10(12.70-13.60)         | 13.10(12.60-13.60)         | 13.10(12.70-13.50)         | 0.657 |
| INR, (R)                                     | 1.00(0.96-1.04)            | 1.00(0.96-1.04)            | 1.00(0.96-1.04)            | 0.722 |
| CPB or not, n (%)                            | 683 (65.36)                | 477 (65.16)                | 206 (65.81)                | 0.887 |
| Operation time, (h)                          | 3.90(3.30-4.40)            | 3.80(3.30-4.50)            | 3.90(3.40-4.40)            | 0.506 |
| Blood loss, (ml)                             | 590.06 (71.32)             | 589.54 (75.17)             | 591.30 (61.45)             | 0.715 |
| Intraoperative transfusion, n (%)            | 26 (2.49)                  | 14 (1.91)                  | 12 (3.83)                  | 0.082 |
| Intraoperative urine output, (ml/kg/h)       | 3.12 (1.93)                | 3.16 (2.02)                | 3.03 (1.71)                | 0.329 |
| Hemoglobin decrease, (g/L)*                  | 25.00(16.00-33.00)         | 25.00(16.00-33.00)         | 24.00(17.00-34.00)         | 0.526 |
| Postoperative first Creatine, ( $\mu$ mol/L) | 70.64(61.29-82.19)         | 70.27(60.88-81.90)         | 71.48(62.34-83.07)         | 0.393 |
| Postoperative first NT-proBNP, (pg/ml)       | 601.60<br>(352.00-1033.00) | 602.10<br>(350.15-1060.75) | 597.70<br>(357.30-1005.00) | 0.932 |
| Preoperative hospital LOS, (d)               | 6.00(4.00-9.00)            | 6.00(4.00-9.00)            | 6.00(4.00-9.00)            | 0.429 |
| TRUST score                                  | 2(1-3)                     | 2(1-3)                     | 2(1-2)                     | 0.413 |
| WILL-BLEED score                             | 1(1-4)                     | 1(1-3)                     | 1(1-4)                     | 0.660 |
| Major Bleeding, n (%)                        | 74(7.08)                   | 52(7.10)                   | 22(7.01)                   | 0.965 |

BSA, body surface area; PTCA, Percutaneous Transluminal Coronary Angioplasty; CHD, coronary heart disease; RBC, red blood cell; WBC, white blood cell; PLT, platelet; BUN, blood urea nitrogen; GFR, glomerular filtration rate; HSCRP, high sensitivity C reactive protein; NT-proBNP, N-terminal prohormone of brain natriuretic peptide; PT, prothrombin time; INR, international normalized ratio; LOS, length of stay.

\*The difference between the preoperative last hemoglobin and the first hemoglobin after surgery.

Table S4. Variables included in statistical and machine learning models

| Parameter                                | Logistic regression | ML algorithms* |
|------------------------------------------|---------------------|----------------|
| Age (years)                              |                     | ✓              |
| Male, n (%)                              |                     | ✓              |
| Height (m)                               |                     | ✓              |
| Weight (kg)                              |                     | ✓              |
| BSA (m <sup>2</sup> )                    | ✓                   | ✓              |
| Smoking history, n (%)                   |                     | ✓              |
| Angina, n (%)                            |                     | ✓              |
| Myocardial infarction, n (%)             |                     | ✓              |
| Arrhythmia, n (%)                        |                     | ✓              |
| Previous surgery, n (%)                  |                     | ✓              |
| Diabetes, n (%)                          | ✓                   | ✓              |
| Hyperlipidemia, n (%)                    |                     | ✓              |
| Hypertension, n (%)                      | ✓                   | ✓              |
| Kidney failure, n (%)                    |                     | ✓              |
| Dialysis, n (%)                          |                     | ✓              |
| Chronic pulmonary disease, n (%)         |                     | ✓              |
| Congestive heart failure, n (%)          |                     | ✓              |
| Anemia, n (%)                            |                     | ✓              |
| Peripheral vascular disease, n (%)       |                     | ✓              |
| Venous disease, n (%)                    |                     | ✓              |
| Cerebrovascular disease, n (%)           |                     | ✓              |
| Previous PTCA, n (%)                     |                     | ✓              |
| Previous thrombolysis, n (%)             |                     | ✓              |
| CHD family history, n (%)                |                     | ✓              |
| Preoperative statin use, n (%)           |                     | ✓              |
| Preoperative anticoagulant use, n (%)    |                     | ✓              |
| Antiplatelet drugs pause <5 days, n (%)  |                     | ✓              |
| Left main coronary artery disease, n (%) |                     | ✓              |
| RBC, (x10 <sup>12</sup> /L)              |                     | ✓              |
| WBC, (x10 <sup>9</sup> /L)               |                     | ✓              |
| PLT, (x10 <sup>9</sup> /L)               |                     | ✓              |
| Platelet distribution width, (fL)        |                     | ✓              |
| Platelet volume, (fL)                    |                     | ✓              |
| Platelet-large cell ration, (%)          |                     | ✓              |
| Thrombocytocrit, (%)                     |                     | ✓              |
| Hemoglobin, (g/L)                        |                     | ✓              |
| Total protein, (g/L)                     | ✓                   | ✓              |
| Albumin, (g/L)                           |                     | ✓              |
| Potassium, (mmol/L)                      |                     | ✓              |
| Sodium, (mmol/L)                         |                     | ✓              |
| Calcium, (mmol/L)                        |                     | ✓              |
| Glucose, (mmol/L)                        |                     | ✓              |
| BUN, (mmol/L)                            |                     | ✓              |
| Creatine, (μmol/L)                       | ✓                   | ✓              |
| GFR, (ml/min/1.73m <sup>2</sup> )        |                     | ✓              |
| HSCRP, (mg/L)                            |                     | ✓              |
| NT-proBNP, (pg/ml)                       | ✓                   | ✓              |
| PT, (s)                                  |                     | ✓              |

|                                        |   |   |
|----------------------------------------|---|---|
| INR, (R)                               |   | ✓ |
| CPB or not, n (%)                      |   | ✓ |
| Operation time, (h)                    |   | ✓ |
| Blood loss, (ml)                       | ✓ | ✓ |
| Intraoperative transfusion, n (%)      | ✓ | ✓ |
| Intraoperative urine output, (ml/kg/h) |   | ✓ |
| Hemoglobin decrease, (g/L)             |   | ✓ |
| Postoperative first Creatine, (μmol/L) |   | ✓ |
| Postoperative first NT-proBNP, (pg/ml) |   | ✓ |
| Preoperative hospital LOS, (d)         |   | ✓ |
| TRUST score                            |   | ✓ |
| WILL-BLEED score                       |   | ✓ |

\*Support vector machines, stochastic gradient boosting, extreme gradient boosting, random forest, conditional inference random forest, boosted classification trees, Naïve Bayes and bagged CART.

#### Table S5. Abbreviations

---

|                                                               |
|---------------------------------------------------------------|
| ML = Machine learning                                         |
| CABG = Coronary artery bypass graft                           |
| UDPB = Universal definition of perioperative bleeding         |
| AUC = Area under the receiver operating characteristic curves |
| TRUST = Transfusion risk understanding scoring tool           |
| LR = Logistic regression                                      |
| AIC = Akaike information criterion                            |
| SVM = Support vector machines                                 |
| SGBT = Stochastic gradient boosting                           |
| XGBoost = Extreme gradient boosting                           |
| RF = Random forest                                            |
| CIRF = Conditional inference random forest                    |
| NB = Naïve Bayes                                              |
| CART = Classification and regression tree                     |
| ROC = Receiver-operating-characteristic curve                 |
| BSA = Body surface area                                       |
| STS PROM = Society of Thoracic Surgeons Predicted             |

---
